# Supplementary material for: New insights into catalytic pyrolysis mechanisms and reaction pathways of urea pyrolysis on V–Ti catalyst surfaces
Source: Royal Society of Chemistry journal article supplement (doi:10.1039/c6ra20031a), 2016-01-01
Supplement: c6ra20031a1.pdf [file c6ra20031a1.pdf]

**Table S1** HPLC Mass Table for urea pyrolysis on the catalysts under dry N<sub>2</sub>.

|                           | Temp. (°C) | Mass (mg) | Urea (mg) | CYA<br>(mg) | Biu (mg) | Mel (mg) | Total recovery (%) |
|---------------------------|------------|-----------|-----------|-------------|----------|----------|--------------------|
| urea                      | 100        | 10.0      | 9.787     | -           | -        | -        | 97.9               |
|                           | 150        | 8.2       | 8.012     | 0.021       | 0.060    | 0.014    | 98.9               |
|                           | 200        | 8.4       | 4.793     | 0.215       | 2.732    | 0.015    | 92.3               |
|                           | 250        | 7.5       | 3.483     | 1.975       | 0.922    | 0.026    | 85.4               |
|                           | 300        | 5.4       | 1.378     | 1.833       | 1.041    | 0.009    | 78.2               |
|                           | 350        | 1.9       | 1.332     | 0.018       | 0.077    | 0.006    | 74.9               |
|                           | 400        | 1.0       | 0.757     | 0.003       | 0.063    | 0.005    | 82.8               |
|                           | 450        | -         | 0.508     | 0.001       | 0.015    | 0.004    | -                  |
| urea<br>/TiO <sub>2</sub> | 100        | 19.4      | 9.595     | -           | -        | -        | 98.9               |
|                           | 150        | 17.3      | 6.763     | 0.004       | 0.395    | -        | 94.2               |
|                           | 200        | 16        | 1.748     | 1.601       | 2.123    | 0.027    | 87.3               |
|                           | 250        | 13.3      | 1.502     | 1.271       | 0.486    | 0.024    | 91.2               |
|                           | 300        | 11.2      | 0.697     | 0.144       | 0.624    | 0.021    | 99.1               |
|                           | 350        | -         | 0.637     | 0.002       | 0.122    | 0.020    | -                  |
|                           | 400        | -         | 0.240     | -           | 0.017    | -        | -                  |
|                           | 450        | -         | 0.156     | -           | 0.005    | -        | -                  |
| urea<br>/1%<br>V-Ti       | 100        | 19.0      | 8.979     | -           | -        | -        | 94.5               |
|                           | 150        | 16.3      | 6.030     | -           | 0.345    | -        | 93.7               |
|                           | 200        | 16.6      | 0.817     | 1.910       | 2.876    | 0.033    | 79.4               |

---

|     |      |       |       |       |       |      |
|-----|------|-------|-------|-------|-------|------|
| 250 | 13.1 | 0.569 | 1.833 | 0.676 | 0.031 | 86.4 |
| 300 | 11.8 | 0.619 | 0.075 | 1.371 | 0.028 | 91.0 |
| 350 | -    | 0.532 | 0.002 | 0.048 | 0.014 | -    |
| 400 | -    | 0.192 | -     | 0.008 | -     | -    |
| 450 | -    | 0.066 | -     | -     | -     | -    |

---

**Table S2** Characteristic vibrational IR signals for urea and their pyrolysis byproducts.

| Byproduct                 | Urea            |              |           |             | Biu       |          | CYA      |                 | Mel      |                 | Amme     |             |      |
|---------------------------|-----------------|--------------|-----------|-------------|-----------|----------|----------|-----------------|----------|-----------------|----------|-------------|------|
| Sample                    | $\nu_{as} NH_2$ | $\beta NH_2$ | $\nu CO$  | $\nu N-C-N$ | $\nu CO$  | $\nu CN$ | $\nu OH$ | RV <sup>a</sup> | $\nu NH$ | RV <sup>a</sup> | $\nu CO$ | $\delta CN$ |      |
| Urea                      | RT <sup>b</sup> | 3446,3346    | 1618,1061 | 1678        | 1464,1153 |          |          |                 |          |                 |          |             |      |
|                           | 150             | 3444,3346    | 1619,1065 | 1674        | 1460,1155 |          |          |                 |          |                 |          |             |      |
|                           | 200             | 3413,3331    | 1620,1066 | 1672        | 1456,1163 | 1329     | 3201     |                 | 3456     |                 |          |             |      |
|                           | 250             | 3423,3332    | 1055      | 1673        | 1464,1149 | 1083     |          | 3209            | 1398     | 3464            | 1722     |             |      |
|                           | 300             | 3318         | 1053      | 1673        | 1466      | 1093     |          | 3199            | 1398     | 1722 1267       |          |             |      |
|                           | 350             | 3327         | 1619,1043 | 1672        | 1464      | 1095     |          | 3197            |          | 1545            |          | 1734        | 1269 |
|                           | 400             | 3329         | 1618,1045 | 1670        | 1464      | 1330     | 1097     |                 | 1544     |                 | 1734     | 1273        |      |
|                           | 450             | 3440         | 1619      | 1668        | 1466      | 1326     |          | 1545            |          | 1734            | 1263     |             |      |
| urea/<br>TiO <sub>2</sub> | RT <sup>b</sup> | 3442,3340    | 1619,1057 | 1681        | 1459,1155 |          |          |                 |          |                 |          |             |      |
|                           | 150             | 3434,3336    | 1614,1074 | 1672        | 1454,1157 | 1334     | 3205     |                 |          |                 |          |             |      |
|                           | 200             | 3426,3336    | 1619,1074 | 1457,1164   |           | 1332     | 3196     | 1403            |          | 1236            |          |             |      |
|                           | 250             | 3444,3428    | 1621,1054 | 1469        |           |          | 3195     | 1398            |          | 1720            |          |             |      |
|                           | 300             | 3423         | 1628      | 1467        |           |          |          |                 |          |                 |          |             |      |
|                           | 350             | 3420         | 1629      |             |           |          |          |                 |          |                 |          |             |      |
| 1% V-<br>Ti               | RT <sup>b</sup> | 3440,3342    | 1619,1062 | 1681        | 1461,1157 |          |          |                 |          |                 |          |             |      |
|                           | 150             | 3444         | 1623,1062 | 1670        | 1454,1160 | 1340     | 3203     |                 |          |                 |          |             |      |
|                           | 200             | 3442         | 1621,1056 | 1456        |           | 1340     | 1079     | 1403            |          | 1720            |          | 1241        |      |
|                           | 250             | 3426,3320    | 1635,1054 | 1463        | 1324      | 3205     |          | 1398            |          | 1718            |          |             |      |
|                           | 300             | 3417         | 1629      | 1459        |           |          | 1726     |                 |          |                 |          |             |      |
| 350                       | 3420            | 1629         |           |             |           |          |          |                 |          |                 |          |             |      |

<sup>a</sup> RV----Ring vibration; <sup>b</sup> RT----Room temperature;
